# Supplementary material for: Impact of COVID-19 on care at the end of life during the first months of the pandemic from the perspective of healthcare professionals from different settings: a qualitative interview study (the CO-LIVE study)
Source: PubMed Central journal article supplement — BMJ Open. 2023 Mar 6;13(3):e063267. doi: 10.1136/bmjopen-2022-063267 (PMC9990162; doi:10.1136/bmjopen-2022-063267), 2023-03-06
Supplement: bmjopen-2022-063267supp002.pdf [file bmjopen-2022-063267supp002.pdf]

## Additional File 2. Themes, subthemes and codes

| Theme                                     | Subtheme                                                          | Code                                                                         |
|-------------------------------------------|-------------------------------------------------------------------|------------------------------------------------------------------------------|
| <b>New disease</b>                        |                                                                   | Clinical view not reliable (-)                                               |
|                                           |                                                                   | Unexpected deterioration (-)                                                 |
|                                           |                                                                   | Symptom relief was hard (-)                                                  |
| <b>High workload</b>                      |                                                                   | Not enough time for care (-)                                                 |
|                                           |                                                                   | Lack of HCP's with the right skills (-)                                      |
|                                           |                                                                   | Higher chance of mistakes (-)                                                |
|                                           |                                                                   | Poor continuity of care (-)                                                  |
|                                           |                                                                   | No time to support relatives (-)                                             |
|                                           |                                                                   | Limited in time they could relatives to say goodbye (-)                      |
| <b>Contagiousness</b>                     |                                                                   | Too much focus on prevention of infections (-)                               |
|                                           | Limited family visits and goodbye's                               | Patients were not able to say goodbye to everyone (-)                        |
|                                           |                                                                   | HCPs could not get to know the patient (-)                                   |
|                                           |                                                                   | Good excuse to refuse someone to say goodbye to the patient (+)              |
|                                           |                                                                   | New digital methods for contact (+)                                          |
|                                           |                                                                   | Limited in giving emotional support to relatives (-)                         |
|                                           | Physical distance between HCP's and patients and their relatives  | Feeling detached from the patient (-)                                        |
|                                           |                                                                   | Spiritual counselors were not allowed (-)                                    |
|                                           |                                                                   | Limited in taking care of deceased patient (-)                               |
|                                           |                                                                   | Limited in giving emotional support to relatives (-)                         |
| <b>Positive effects for the long term</b> | Feelings of detachment due to personal protective equipment (PPE) | HCP's were unrecognizable, not understandable and scary for patients (-)     |
|                                           |                                                                   | Allowed HCP's to touch patients (+)                                          |
|                                           |                                                                   | Being more reluctant to visit patients because they had to change in PPE (-) |
|                                           |                                                                   | More awareness for advance care planning (+)                                 |
|                                           |                                                                   | More awareness for better staff policy (+)                                   |
|                                           | Realization the importance of adequate end-of-life care (+)       |                                                                              |
